# Supplementary material for: Verhaltensanalysen und objektive Merkmalsbeurteilungen bei Personen mit olfaktorischer Referenzstörung
Source: Atypon-hosted journal article supplement (doi:10.1026/1616-3443/a000659), 2022-01-01
Supplement: 1616-3443_a000659_esm2.pdf [file 1616-3443_a000659_esm2.pdf]

## EMS 2: Detailbeschreibung des Versuchsablaufs

Für unsere Versuchsbausteine lag kein etabliertes Forschungsparadigma zugrunde. Die Aufgaben wurden innerhalb unseres Forschungsteams entwickelt.

### Erhebung der Geruchssensitivität

Um auszuschließen, dass die Teilnehmenden mit ORS tatsächlich eine bessere oder schlechtere Geruchswahrnehmung in Bezug auf schweißassoziierte Gerüche haben als die Kontrollpersonen, wurde mit den Teilnehmenden ein Geruchstest durchgeführt. In diesem Test erhielten sie 5 künstliche Geruchsreihen (Buttersäure, Cadaverin, Guajakol, 3H3M, 3H3M1B), die jeweils aus 6 Verdünnungen bestanden und in zufälliger Reihenfolge präsentiert wurden. Die olfaktorischen Reize waren alle mit Schweiß verbunden, um eine spezifische Anosmie oder Hyperosmie auszuschließen. Die Teilnehmenden wurden gebeten anzugeben, wann sie den Geruch riechen konnten. Ein statistischer Vergleich der Geruchssensitivität ergab, dass sich die Gruppen (ORS vs. Kontrolle) nicht signifikant voneinander unterschieden. Die genauen Ergebnisse sind in Schmidt et al. (eingereicht zur Publikation) nachzulesen.

### Abgabe einer Schweißprobe

Die Teilnehmenden wurden gebeten, 24 Stunden lang Kompressen (10\*10 cm) unter ihren Achseln zu tragen. Bevor sie diese anbrachten, mussten sie mit einer geruchlosen Flüssigseife (vom Projektteam zur Verfügung gestellt) für Körper und Haare duschen. Danach mussten sie die Pads anlegen und ein weißes T-Shirt aus Baumwolle anziehen. Das T-Shirt wurde nach dem Kauf zweimal gewaschen (vom Projektteam), zuerst mit und dann ohne Reinigungsmittel, um Rückstände zu vermeiden. Während des 24-Stunden-Zeitraums durften die Teilnehmenden kein Deodorant oder Parfüm verwenden. Außerdem mussten sie mit dem Rauchen aufhören, durften kein scharfes Essen oder Knoblauch essen und jede Art von Sport reduzieren. Wenn möglich, wurden sie gebeten, alleine zu schlafen. Nach 24 Stunden kamen sie in unser Labor und nahmen die Achselpads ab. Sie gaben die Pads dem Untersuchungsleiter, der beide Pads (rechts und links) in zwei Teile von 5\*10 cm schnitt. Eine der Hälften wurde für chemische Analysen verwendet (in diesem Artikel nicht erörtert). Die andere Hälfte wurde in 8 Teile von 2,5 cm geschnitten. Diese kleineren Teile jedes rechten und linken Pads wurden in eine klare 50 ml Glasflasche gegeben, die mit einem Plastiksraubverschluss verschlossen war. Jede Flasche wurde in einem Gefrierschrank aufbewahrt.

### Einschätzung von Videosequenzen, Fotos und Geruchsproben

Zusätzlich wurde ein Profilfoto von allen Teilnehmenden gemacht, das sie mit neutralem Gesichtsausdruck von vorne zeigte. Außerdem wurden sie gebeten einen Flur zweimal auf und ab zu gehen, wobei sie mit einer Kamera gefilmt wurden. Die Fotos und Videos, sowie eine Geruchsprobe der Teilnehmenden wurden vier Mitarbeitenden der Universität präsentiert, die nicht mit dem Projekt vertraut waren. So sollte eine möglichst intuitive Einschätzung der Teilnehmenden durch vier Außenstehende (Beurteilende) erfolgen und zwar im Hinblick auf die Erscheinung (attraktiv/ unattraktiv/ sympathisch/ unsympathisch) und das Kontaktbedürfnis, dass die Teilnehmenden bei den Beurteilenden auslösten. Bei der Geruchsprobe war interessant, ob die unabhängigen Bewertungen ergeben, dass der Körpergeruch von ORS Betroffen tatsächlich als unangenehmer wahrgenommen wird, als der von den Kontrollpersonen. Zur Einschätzung wurden 10cm lange Analogskalen verwendet, die jeweils von der Ausprägung „wenig“ bis „sehr“ reichten. Die Ergebnisse wurden mit einem Lineal abgelesen.

Die Beurteilenden kamen jeweils an unterschiedlichen Tagen für die Fotos, Videos und Geruchsproben in das Labor. Auf diese Weise sollten Übertragungseffekte minimiert werden. Die einzelnen Stimuli wurden den beurteilenden Personen in zufälliger Reihenfolge vorgelegt. Bei der Darbietung der Fotos wurde ein Zeitfenster von 2 Sekunden gewählt. Laut einer Studie von (Willis & Todorov, 2006) ist bereits eine dritte Sekunde ausreichend, damit Beurteilende eine valide Aussage von der gezeigten Person machen können. Da wir aber keine Stressreaktion -durch die zu schnelle Darbietung der Fotos- bei den beurteilenden Personen auslösen wollten und das Urteil mit steigender Darbietungsdauer sicherer wird (Willis & Todorov, 2006), entschieden wir uns für 2 Sekunden. Sie bewerteten die Reize auf einer 10cm langen visuellen Analogskala (z.B. 0= wenig attraktiv bis 10= sehr attraktiv).
