# Supplementary material for: Verhaltensanalysen und objektive Merkmalsbeurteilungen bei Personen mit olfaktorischer Referenzstörung
Source: Atypon-hosted journal article supplement (doi:10.1026/1616-3443/a000659), 2022-01-01
Supplement: 1616-3443_a000659_esm3.pdf [file 1616-3443_a000659_esm3.pdf]

## Interviewleitfaden: Verhaltensanalyse

Ich möchte nun mit Ihnen typische Situationen besprechen, in denen Ihre Befürchtungen normalerweise auftreten. Eine typische Situation kann von bestimmten Ereignissen begleitet werden. Zum Beispiel können bestimmte Personen anwesend sein, Körperempfindungen oder Gedanken auftreten.

Außerdem möchte ich erfahren, wie Sie normalerweise mit diesen Befürchtungen umgehen und auf sie reagieren.

Schildern Sie dann einfach ganz frei was Ihnen einfällt.

Haben Sie noch Fragen?

1. Bitte nennen Sie mir eine typische Situation in der Ihre Befürchtungen normalerweise auftreten!

1.1 Was bemerken Sie in diesen Situationen zuerst? (Was nehmen Sie wahr?)

1.2 Was passiert (noch) in diesen Situationen? (z.B. Was sehen, riechen, hören Sie?)

2. Wie erklären Sie sich, dass Ihnen diese Situationen so schwer fallen?

3. Wie reagieren Sie darauf?

3.1 Was tun Sie konkret um mit der Befürchtung umzugehen?

3.2 Was für Gefühle empfinden Sie in der Situation?

3.3 Was denken Sie in der Situation? Was geht Ihnen durch den Kopf?

3.4 Was nehmen Sie körperlich wahr? Bemerkten Sie körperliche Veränderungen?

4. Sind diese Reaktionen hilfreich für Sie?

4.1 Wie hilft Ihnen Ihr Verhalten kurzfristig und langfristig?
