# Supplementary figures and images for: Verhaltensanalysen und objektive Merkmalsbeurteilungen bei Personen mit olfaktorischer Referenzstörung
Source: Atypon-hosted journal article supplement (doi:10.1026/1616-3443/a000659), 2022-01-01

## Flow-Chart zum Rekrutierungsverlauf

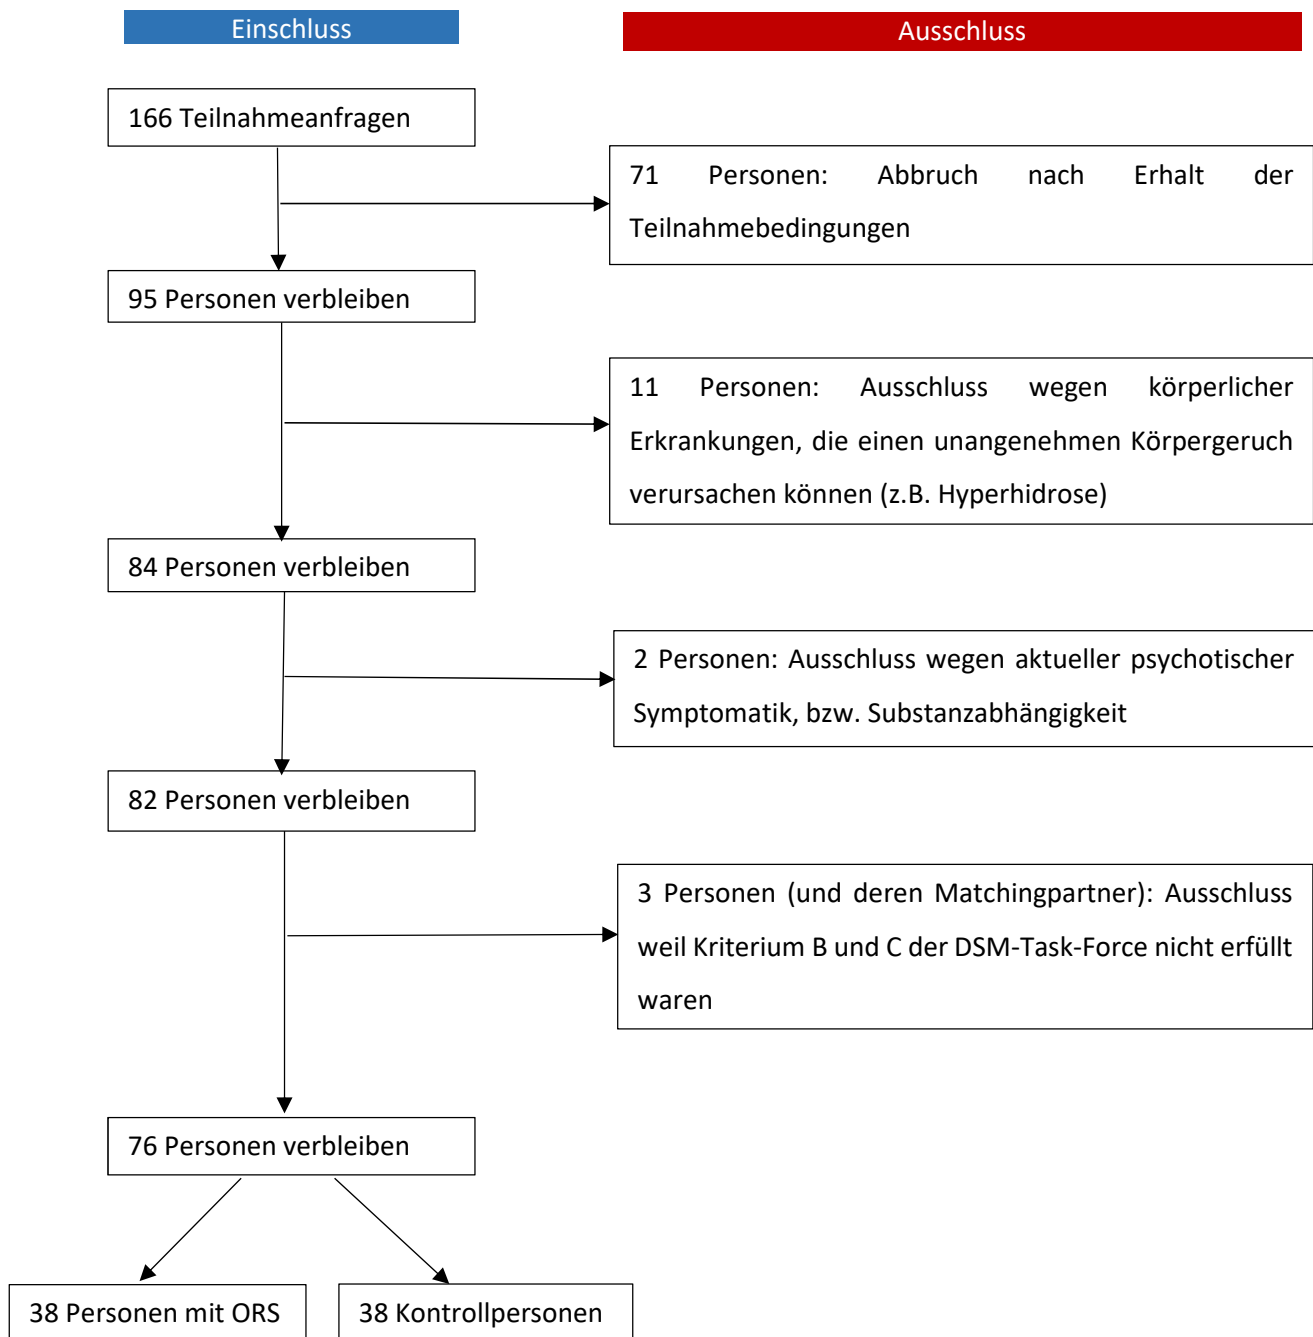

Supplement: 1616-3443_a000659_esm4.pdf [file 1616-3443_a000659_esm4.pdf]
